# Supplementary material for: A three-dimensionally stretchable high performance supercapacitor
Source: Royal Society of Chemistry journal article supplement (doi:10.1039/c6ta05545a), 2016-01-01
Supplement: c6ta05545a1.pdf [file c6ta05545a1.pdf]

## Supporting Information

### A three-dimensionally stretchable high performance supercapacitor

*Sisi He,<sup>a</sup> Longbin Qiu,<sup>a</sup> Lie Wang,<sup>a</sup> Jingyu Cao,<sup>a</sup> Songlin Xie,<sup>a</sup> Qiang Gao,<sup>ab</sup> Zhitao Zhang,<sup>a</sup> Jing Zhang,<sup>a</sup> Bingjie Wang\*<sup>a</sup> and Huisheng Peng\*<sup>a</sup>*

*<sup>a</sup>State Key Laboratory of Molecular Engineering of Polymers, Department of Macromolecular Science and Laboratory of Advanced Materials, Fudan University, Shanghai 200438, China; E-mail: penghs@fudan.edu.cn.*

*<sup>b</sup>Key Laboratory of Science and Technology of Eco-Textiles, Ministry of Education, Jiangnan University, Wuxi 214122, China*

## Experimental section

*Characterization.* The structures were characterized by scanning electron microscopy (SEM) (Hitachi FE-SEM S-4800) and transmission electron microscope (TEM) (JEOL JEM-2100F). The photographs were taken by a digital camera (Nikon, J1). The electrical conductivities were measured by Keithley Model 2400 Source Meter. The thicknesses were obtained using a surface profiler (Veeco, Dektak 150). The weight of the carbon nanotube (CNT) film was measured by using a microbalance (Sartorius SE2). The oxygen plasma treatment was performed in an oxygen microwave (Plasma System 690, PVA Tepla). Galvanostatic charge-discharge curves and cyclic voltammograms were conducted at an electrochemical workstation (CHI 660D). Cyclic galvanostatic charge-discharge measurements were characterized from an ARBIN electrochemical station (MSTAT-5 V/10 mA/16 Ch).

*Calculation of electrochemical parameters of supercapacitors.* The areal capacitance ( $C_A$ ), gravimetric capacitance ( $C_M$ ) and volumetric capacitance ( $C_V$ ) are calculated by the following equations:  $C_A = 2 \times I \times \Delta t / (S \times U)$ ,  $C_V = 2 \times I \times \Delta t / (V \times U)$  and  $C_M = 2 \times I \times \Delta t / (m \times U)$ . Here  $I$ ,  $\Delta t$  and  $U$  are discharge current, discharge time and voltage window, respectively.  $S$ ,  $m$  and  $V$  are the total surface area, mass and volume of the electrode, respectively. In this work,  $m$  was measured by using a microbalance, typically 0.619 mg for a CNT film with an area of 0.36 cm<sup>2</sup>. The volume of the electrode can be obtained by  $V = L \times W \times H$ , where  $L$ ,  $W$  and  $H$  represent the length, width and thickness of the CNT film, respectively. In a symmetrical supercapacitor, the specific capacitance of supercapacitor  $C_S = 0.25 \times C_E$  where  $C_E$  is the capacitance of a single electrode. The volumetric energy density ( $E_V$ ) and volumetric power density ( $P_V$ ) of the supercapacitor can be expressed as:  $E_V = 0.5 \times C_S \times U^2 = 0.125 \times C_V \times U^2$  and  $P_V = E_V \times 3600 / \Delta t$ .

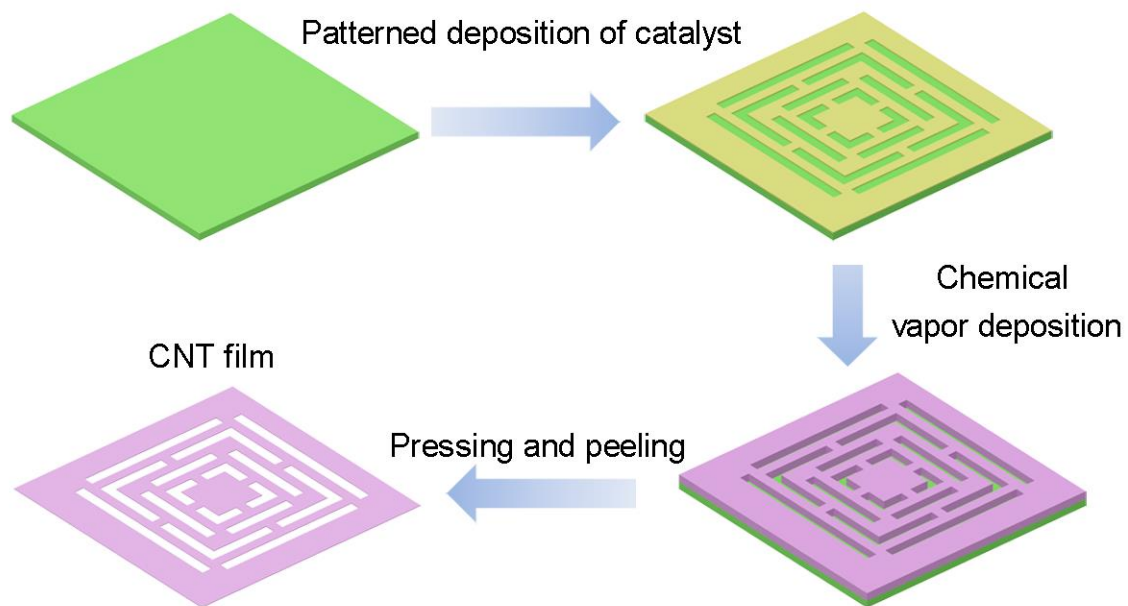

**Figure S1.** Schematic illustration to the preparation of a pyramid-shaped CNT film. The preparation included the selected deposition of catalyst and growth of aligned CNT array, followed by pressing and peeling to obtain the desired CNT film.

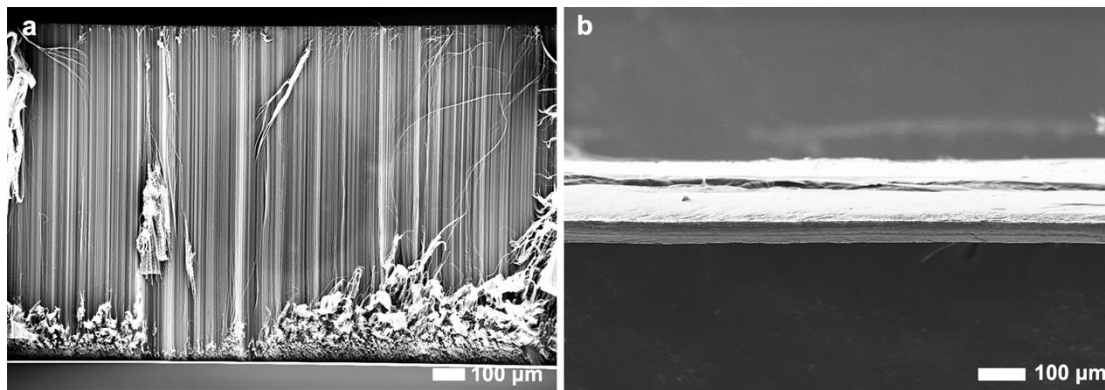

**Figure S2.** SEM images of the CNT array before (a) and after pressing (b).

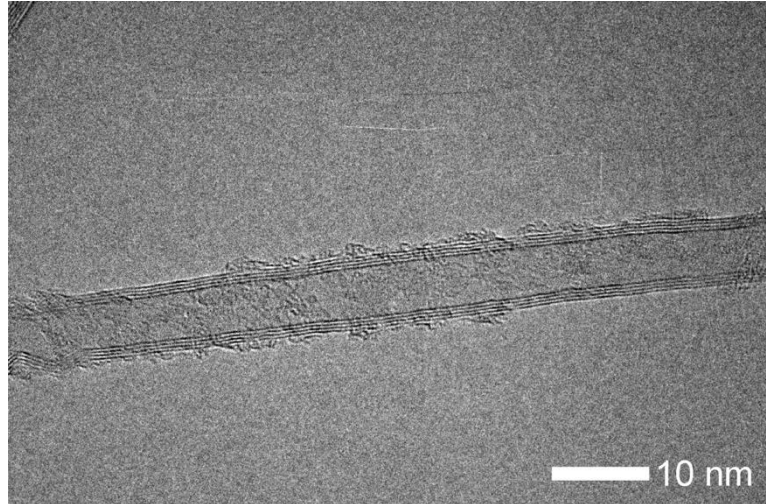

**Figure S3.** TEM image of a CNT.

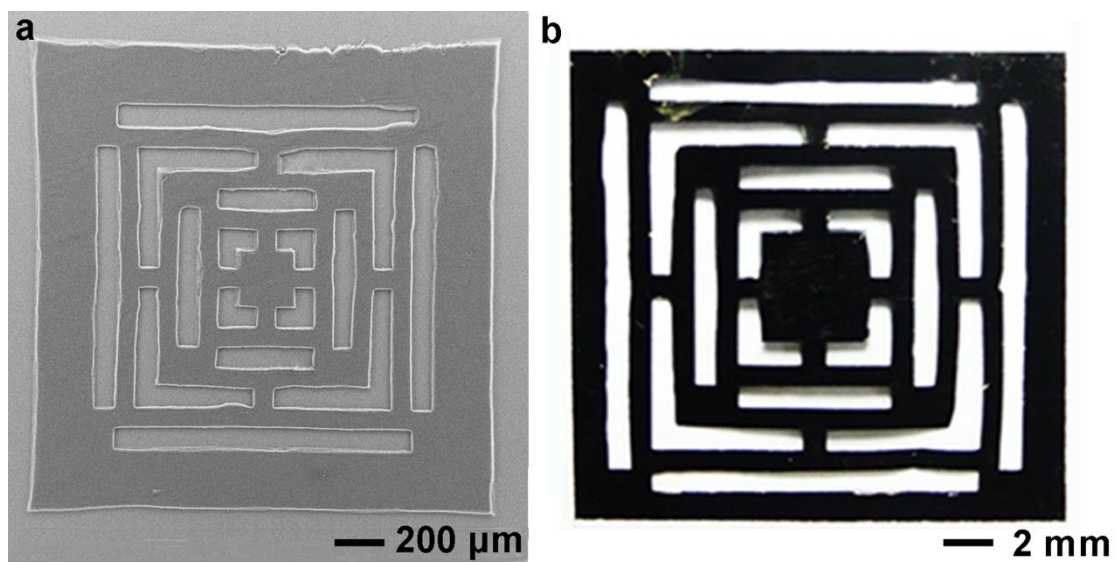

**Figure S4.** (a) SEM image of a pyramid-shaped CNT film with widths of millimeters. (b) Photograph of a pyramid-shaped CNT film with widths of centimeters.

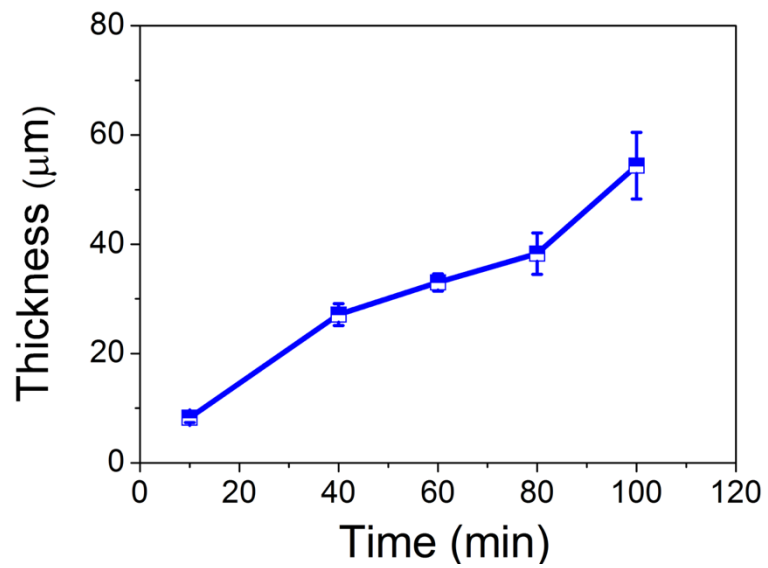

**Figure S5.** Dependence of the CNT film thickness (after pressing) on the growth time.

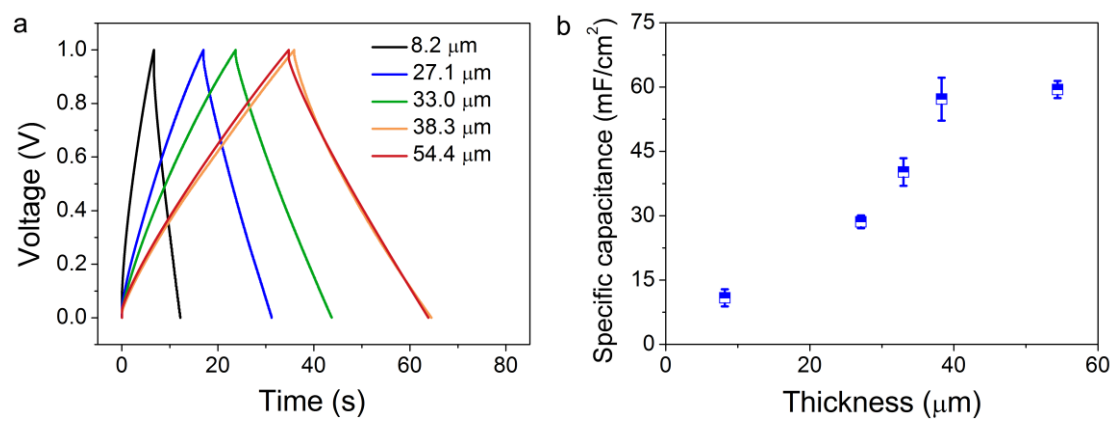

**Figure S6.** (a) Galvanostatic charge-discharge profiles with increasing thicknesses of the CNT film electrodes at the current density of 1 mA/cm<sup>2</sup>. (b) Dependence of the specific capacitance on the CNT thickness.



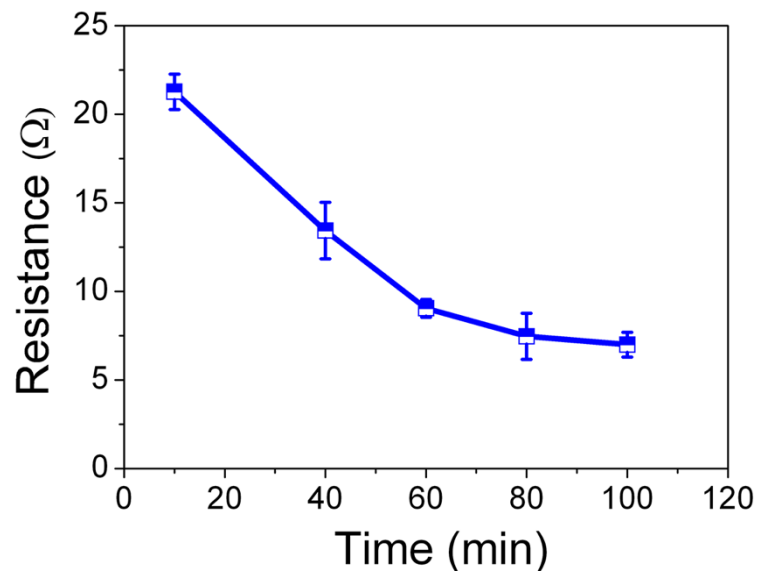

**Figure S7.** Dependence of the resistance of CNT film on the growth time. The CNT films shared a width of 2 mm and length of 5 mm.

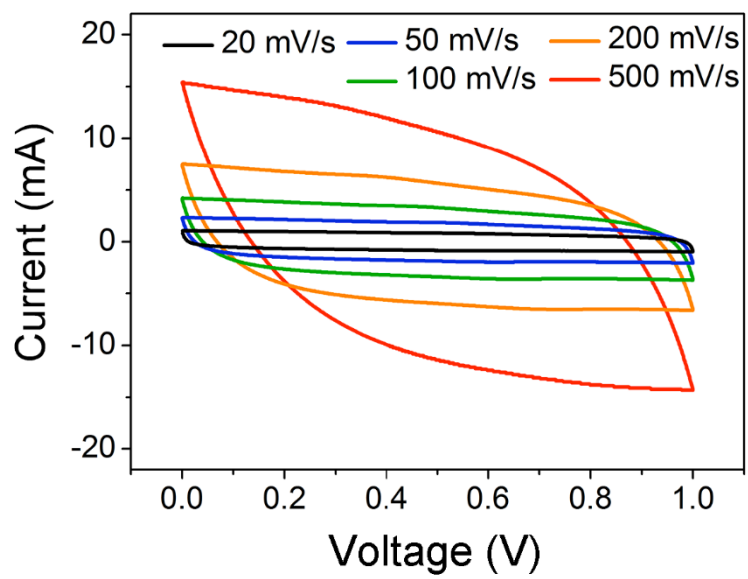

**Figure S8.** Cyclic voltammograms at increasing scan rates from 20 to 500 mV/s.

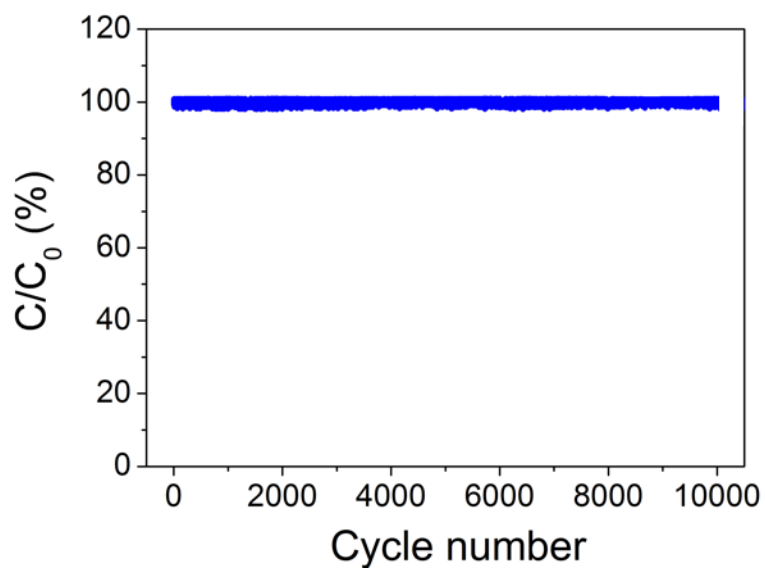

**Figure S9.** Dependence of the specific capacitance on the cycle number at a current density of  $1 \text{ A/cm}^2$ . Here  $C_0$  and  $C$  correspond to specific capacitances before and after cycling, respectively.

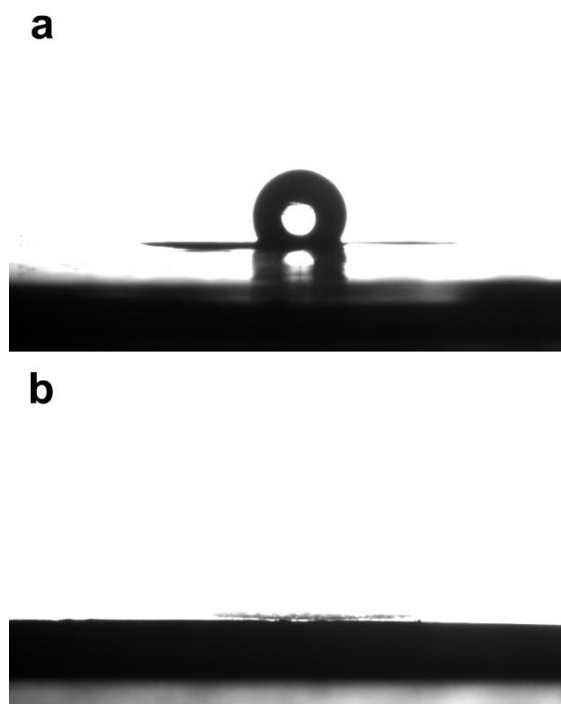

**Figure S10.** The surface properties of a CNT film before and after oxygen plasma treatment. **(a)** Hydrophobic. **(b)** Hydrophilic.

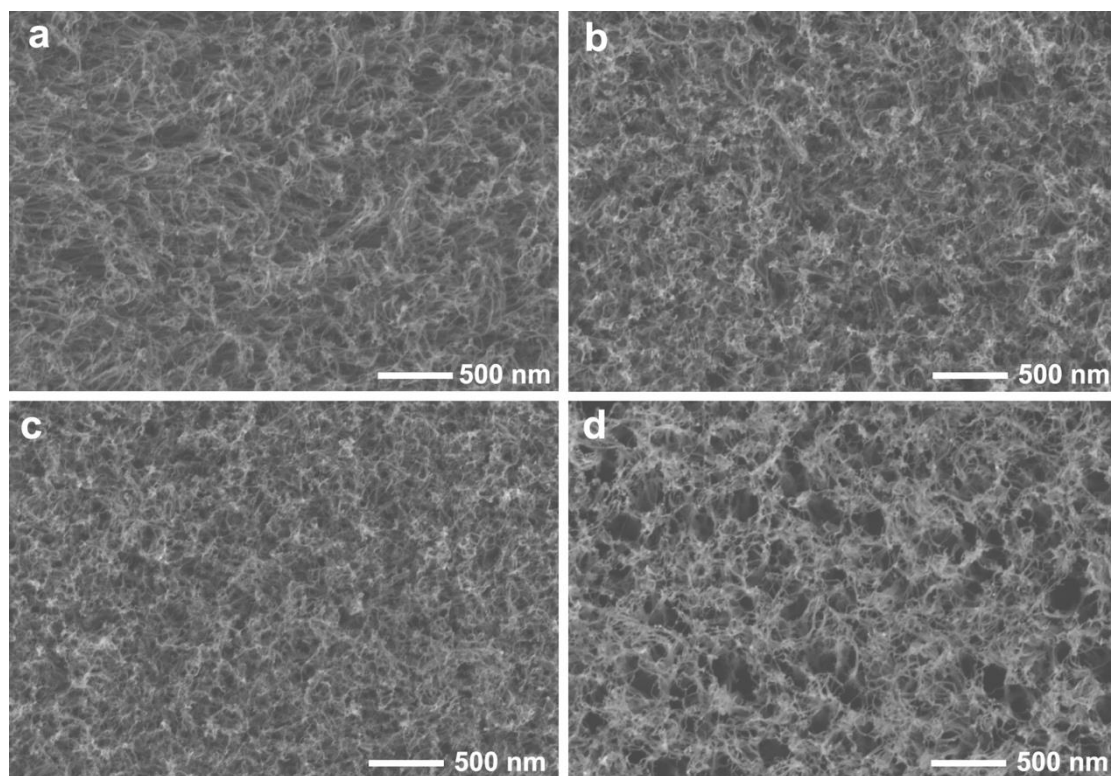

**Figure S11.** Surface morphologies of CNT films after oxygen plasma treatment with increasing oxygen contents. (a) 5.29 wt%. (b) 6.67 wt%. (c) 8.26 wt%. (d) 9.27 wt%.

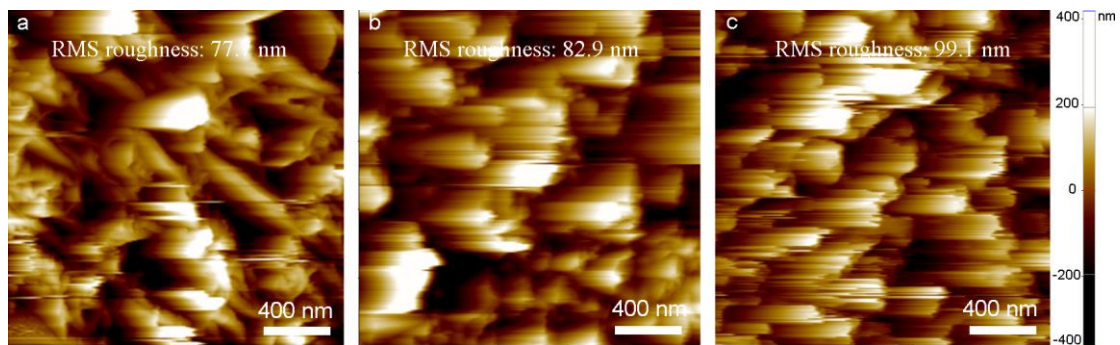

**Figure S12.** AFM images of the CNT films after oxygen plasma treatment with increasing oxygen contents with the primary film as a comparison. **(a)** 3.06 wt%, **(b)** 5.29 wt% and **(c)** 9.27 wt%.

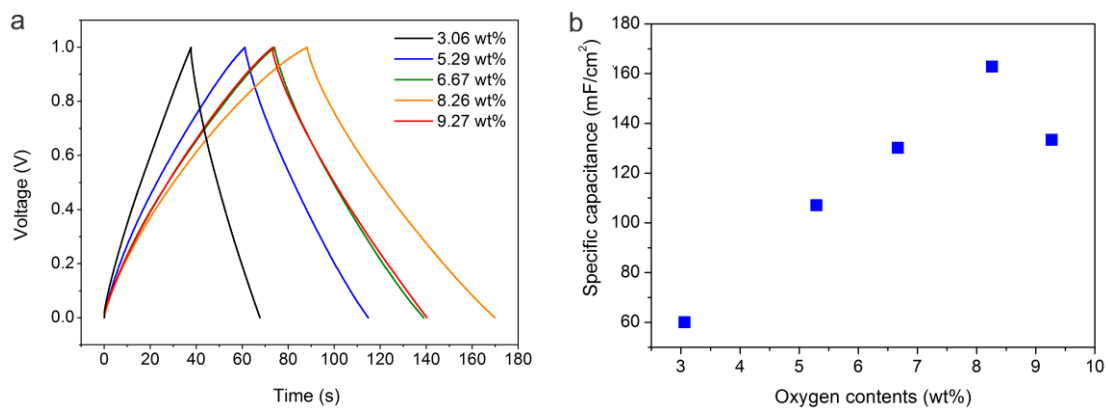

**Figure S13. (a)** Galvanostatic charge-discharge profiles at increasing oxygen contents. **(b)** Dependence of the specific capacitance on the oxygen content.

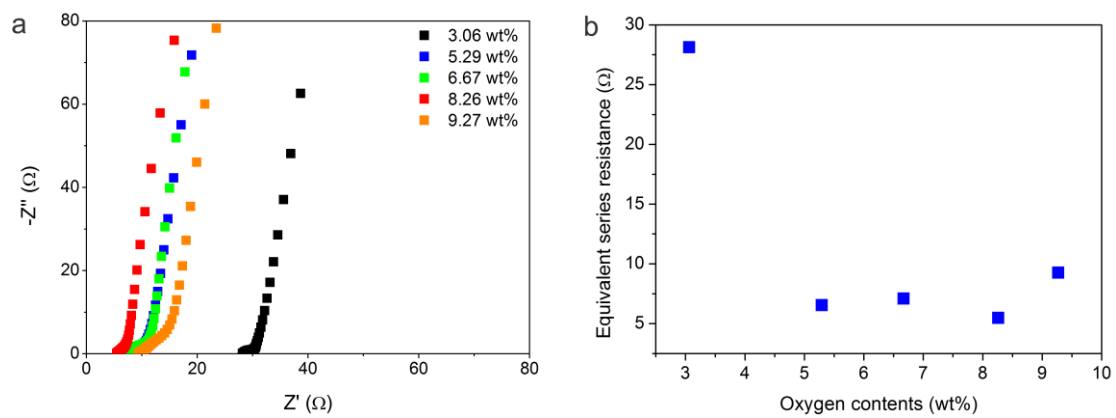

**Figure S14. (a)** Nyquist plots of the supercapacitors fabricated from CNT films with increasing oxygen contents. **(b)** The equivalent series resistance of the supercapacitors fabricated from CNT films with increasing oxygen contents.



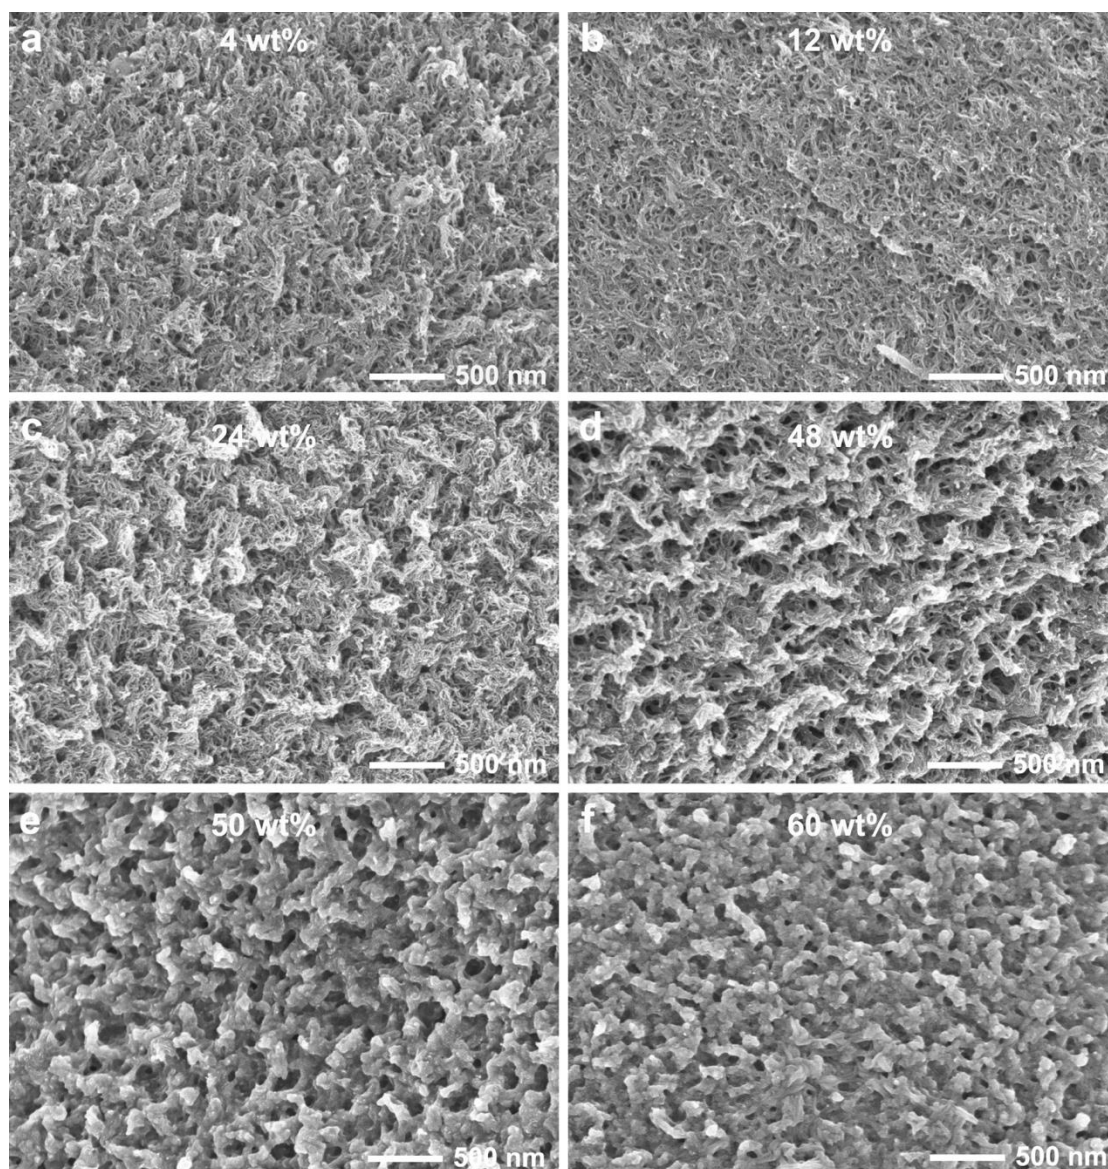

**Figure S15.** SEM images of the CNT/PANI composite films with increasing PANI weight contents from 4 wt% (a), 12 wt% (b), 24 wt% (c), 48 wt% (d), and 50 wt% (e) to 60 wt% (f).

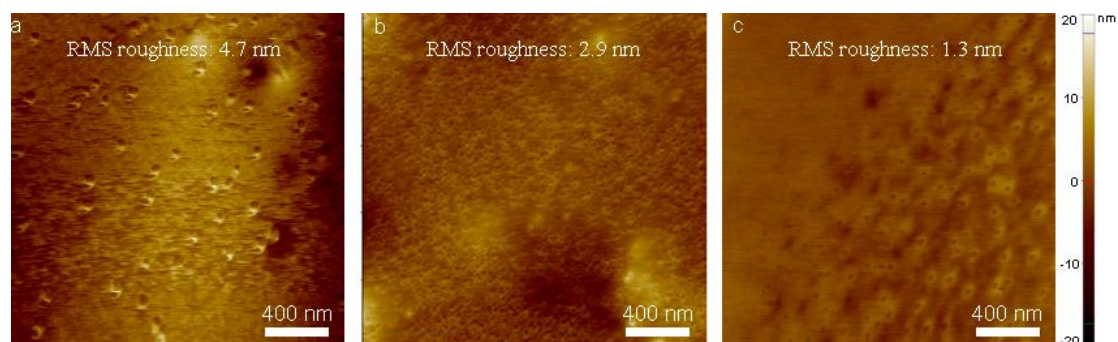

**Figure S16.** AFM images of the CNT/PANI composite films with increasing PANI weight contents. **(a)** 4 wt%, **(b)** 48 wt% and **(c)** 60 wt%.

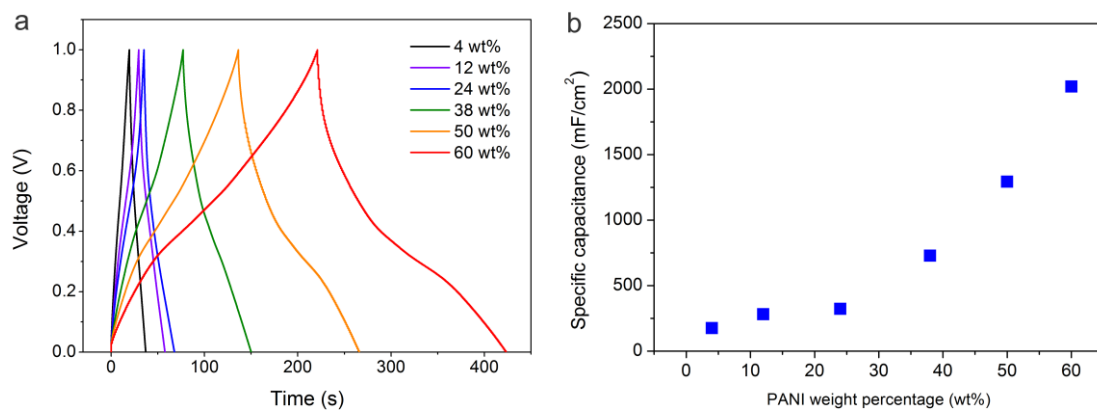

**Figure S17.** (a) Galvanostatic charge-discharge profiles at increasing PANI weight percentages. (b) Dependence of the special capacitance on the PANI weight percentage.

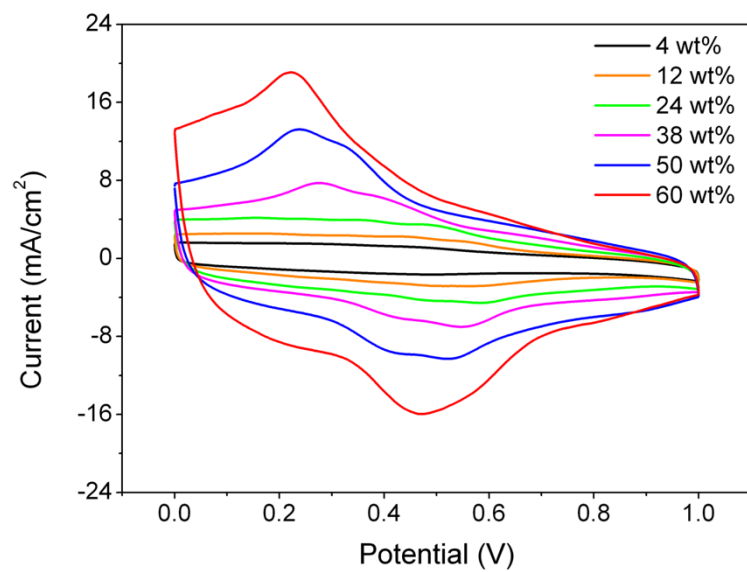

**Figure S18.** Cyclic voltammograms at increasing PANI weight percentages.

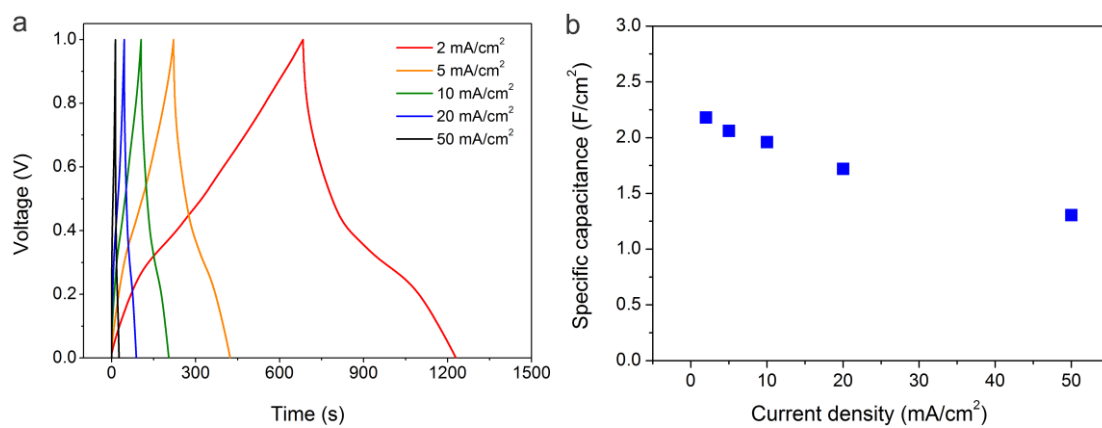

**Figure S19.** (a) Galvanostatic charge-discharge profiles of the supercapacitor from the CNT/PANI composite film electrode (60 wt% PANI) at increasing current densities. (b) Dependence of the specific capacitance on the current density.

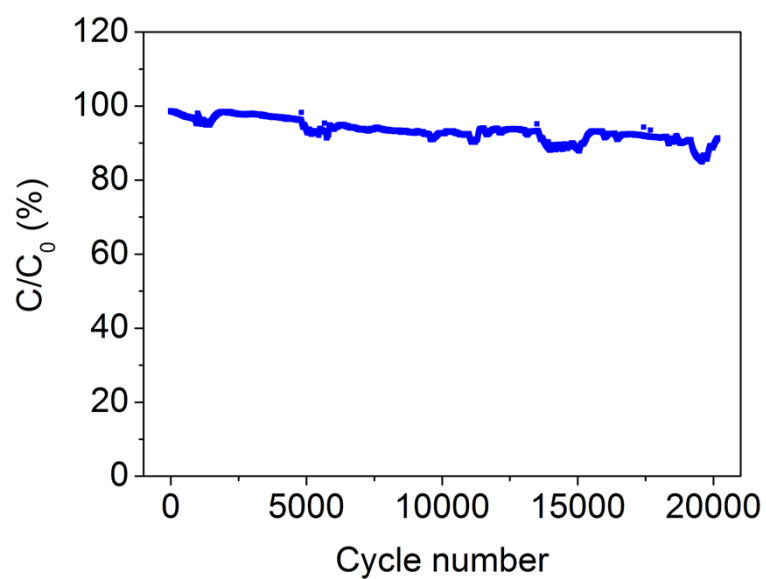

**Figure S20.** Dependence of the specific capacitance on the cycle number at a current of 1 mA. Here  $C_0$  and  $C$  correspond to specific capacitances before and after cycling, respectively.

**Table S1.** Oxygen contents of CNT films as verified by energy-dispersive X-ray spectra after oxygen plasma treatment with increasing times.

| Treatment time | C/wt% | O/wt% |
|----------------|-------|-------|
| 0              | 96.94 | 3.06  |
| 1              | 94.71 | 5.29  |
| 2              | 93.33 | 6.67  |
| 5              | 91.74 | 8.26  |
| 10             | 90.73 | 9.27  |
